# Supplementary material for: Peierls distortion, large Seebeck coefficient, and dispersibility of green solution phase synthesized tellurium nanoparticles
Source: Royal Society of Chemistry journal article supplement (doi:10.1039/d1tc03697a), 2021-12-06
Supplement: d1tc03697a1.pdf [file d1tc03697a1.pdf]

Supplementary Information

# Peierls Distortion, Large Seebeck Coefficient, and Dispersibility of Green Solution Phase Synthesis of Tellurium Nanoparticles

Monika Saxena and Gunadhori S. Okram\*

UGC-DAE Consortium for Scientific Research, University Campus, Khandwa Road  
Indore-452001 (India).

\*okram@csr.res.in

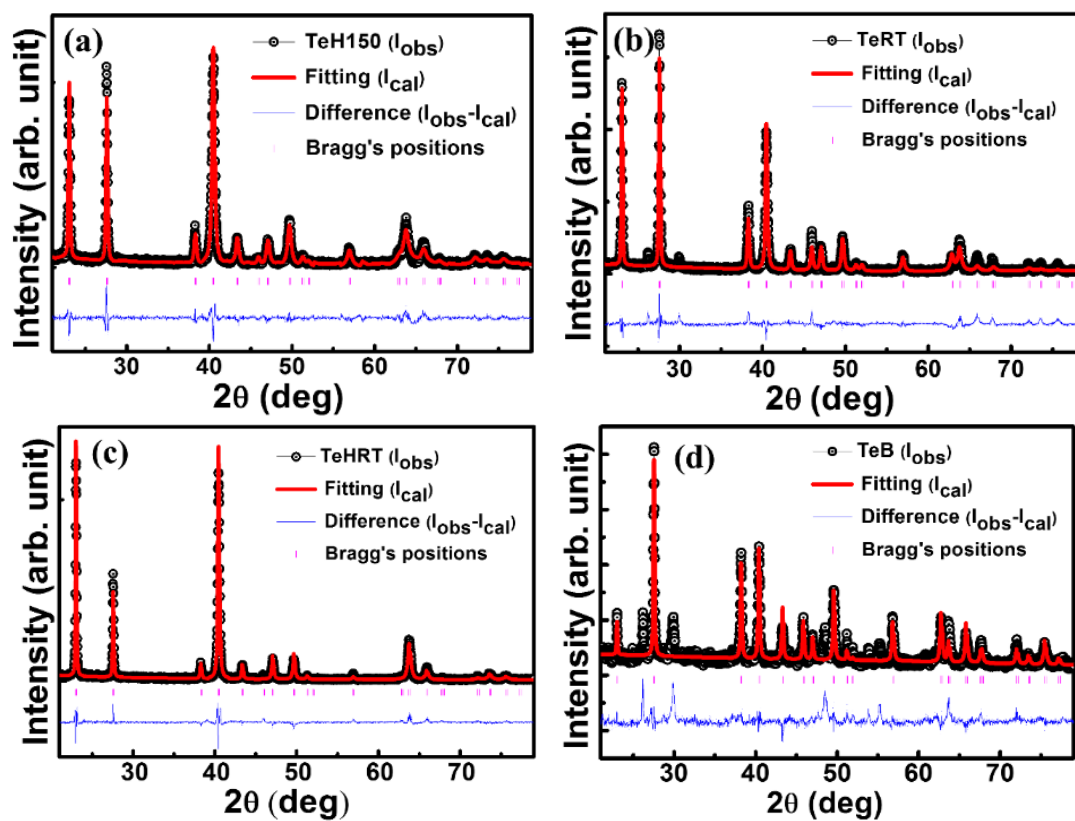

Fig. S1 Rietveld refinement of (a) TeH150, (b) TeRT, (c) TeHRT and (d) TeB.

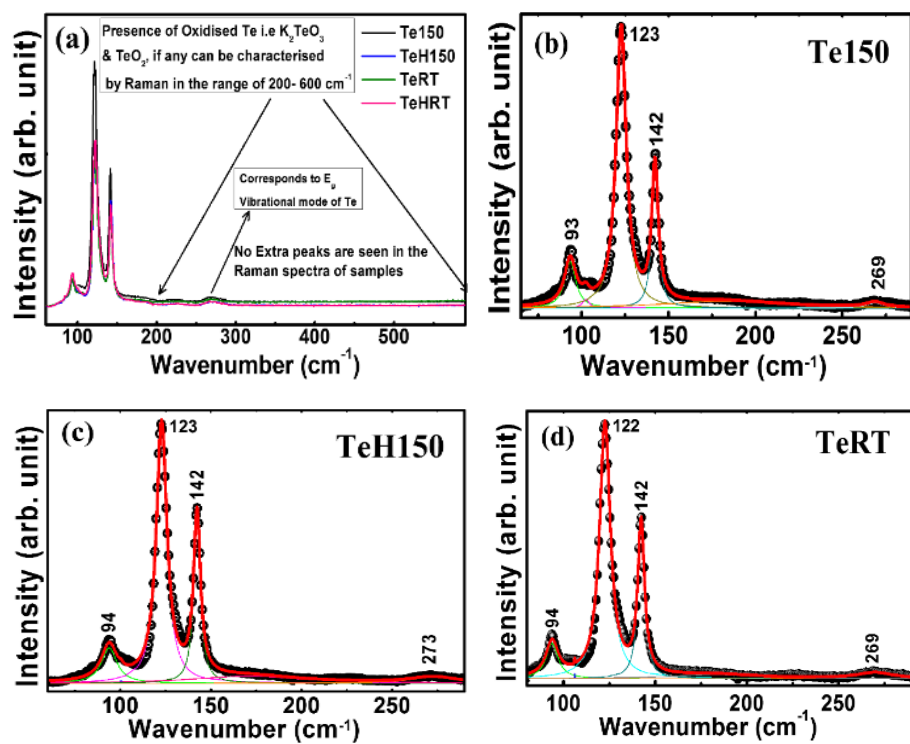

Fig. S2 (a) Raman spectra range 50-600  $\text{cm}^{-1}$  and Multipeak Lorentzian fitting of (b) Te150, (c) TeH150 and (d) TeRT.
